# Supplementary material
Source: publisher figshare collection journal article supplement (https://sage.figshare.com/ndownloader/files/34022697)
Supplement: Supplementary file 1 [file 34022697]

# **Characteristics of included studies**

## **Methods & Participants**

|  | **Descriptions as stated in report/paper** | **Location in text or source** *(pg & ¶/fig/table/other)* |
| --- | --- | --- |
| **Research questions** |  |  |
| **Design (qualitative, quantitative, mixed)** |  |  |
| **Population description** |  |  |
| **Setting (primary, secondary, higher education, others - specify)** |  |  |
| **Other relevant sociodemographics** |  |  |
| **Notes:** | | |

#

#

# **Research question 1: How is language learner autonomy conceptualised?**

|  | **Description as stated in report/paper** | **Location in text or source** *(pg & ¶/fig/table/other)* |
| --- | --- | --- |
| **Aspects of the conceptual framework** |  |  |
| **Theoretical underpinnings (e.g., which theory/earlier framework is it based on?)** |  |  |
| **Notes:** | | |

# **Research question 2: How is language learner autonomy operationlised/realised?**

|  | **Description as stated in report/paper** | **Location in text or source** *(pg & ¶/fig/table/other)* |
| --- | --- | --- |
| **Context of the intervention (e.g., similar information with “setting” on p.1)** |  |  |
| **Description of the intervention** |  |  |
| **Duration of the intervention** |  |  |
| **Materials used** |  |  |
| **Information about teacher and learners (e.g., similar information with “population description” on p.1)** |  |  |
| **Role of the teacher** |  |  |
| **Role of the learners** |  |  |
| **Notes:** | | |

# **Research question 3: How is language learner autonomy evaluated?**

|  | **Description as stated in report/paper** | **Location in text or source** *(pg & ¶/fig/table/other)* |
| --- | --- | --- |
| **Evaluation mechanism/tool** |  |  |
| **Nature of evaluation (e.g., perceptual, effectiveness)** |  |  |
| **Teacher’s perception** |  |  |
| **Learners’ perception** |  |  |
| **Effectiveness/outcome** |  |  |
| **Notes:** | | |

# **Other information**

|  | **Description as stated in report/paper** | **Location in text or source** *(pg & ¶/fig/table/other)* |
| --- | --- | --- |
| **Key conclusions of study** |  |  |
